# Supplementary material for: Probing cage dynamics in concentrated hard-sphere suspensions and glasses with high frequency rheometry
Source: Royal Society of Chemistry journal article supplement (doi:10.1039/d4sm01428f), 2025-01-01
Supplement: d4sm01428f1.pdf [file d4sm01428f1.pdf]

## SUPPLEMENTARY MATERIAL

### Probing cage dynamics in concentrated hard-sphere suspensions and glasses with high frequency rheometry

THANASIS ATHANASIOU<sup>1,2</sup>, BAICHENG MEI<sup>3</sup>, KENNETH S. SCHWEIZER<sup>\*3,4</sup>

AND GEORGE PETEKIDIS<sup>\*1,2</sup>

<sup>1</sup>*Institute of Electronic Structure & Laser, FORTH, Heraklion, 70013 Greece*

<sup>2</sup>*Department of Materials Science and Technology, University of Crete, Heraklion, 70013 Greece*

<sup>3</sup>*Department of Material Science and Materials Research Laboratory, University of Illinois at Urbana-Champaign, Urbana, Illinois 61801, USA*

<sup>4</sup>*Department of Chemistry and Department of Chemical & Biomolecular Engineering, University of Illinois at Urbana-Champaign, Urbana, Illinois 61801, USA*

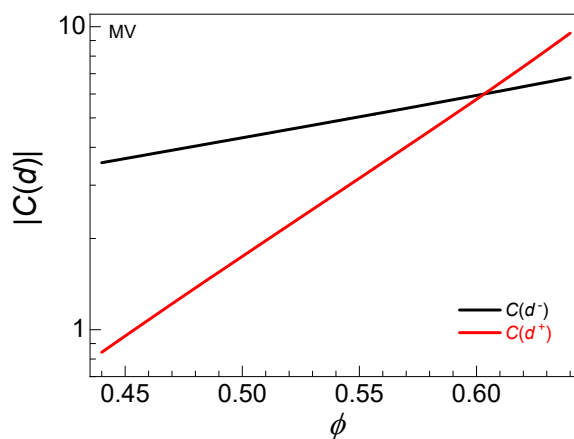

Fig. S1: Absolute value of direct correlation function at contact predicted by OZ-MV theory.

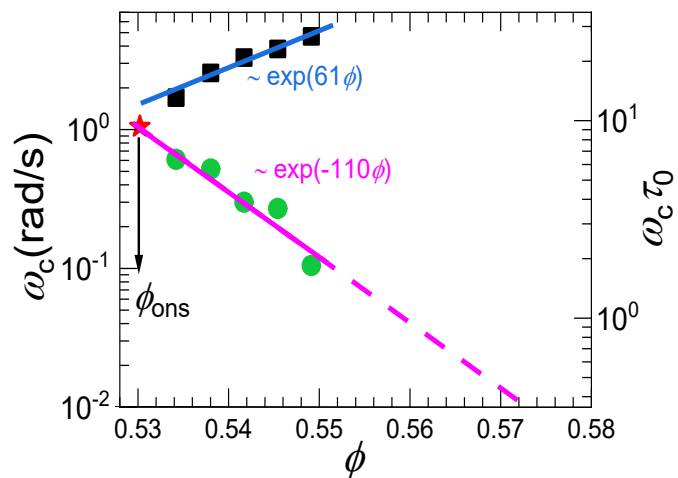

Fig. S2: Extrapolation of the experimental low frequency crossover frequency (dashed magenta line) to higher volume fractions. In this regime the low frequency crossover is outside our experimental window.
